# Supplementary material for: Boiogito, a Kampo medicine, improves hydrarthrosis in a rat model of knee osteoarthritis
Source: PubMed Central journal article supplement (PMC4691021; doi:10.1186/s12906-015-0979-7), 2015-12-24
Supplement: 12906_2015_979_MOESM1_ESM.pdf [file 12906_2015_979_MOESM1_ESM.pdf]

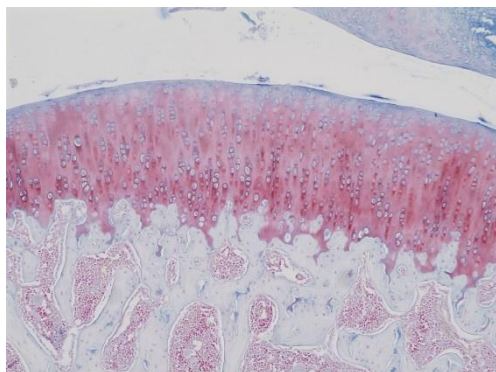

Sham-operated rats

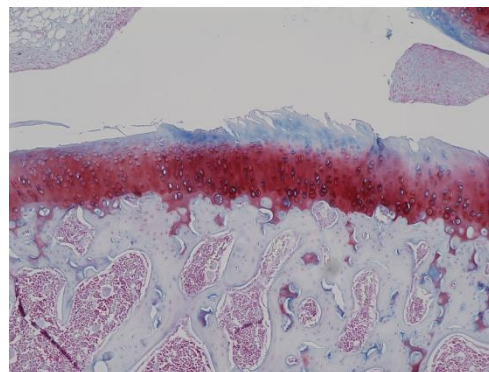

Non-treated control  
rats with OA

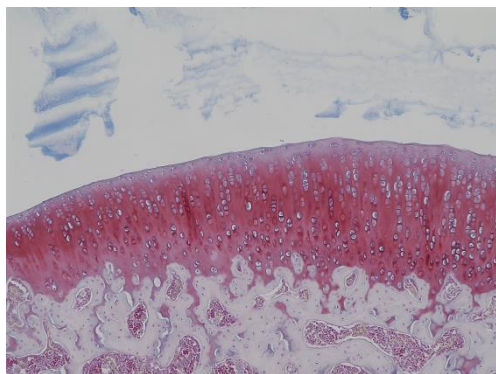

Boiogito (2%)-treated  
rats with OA

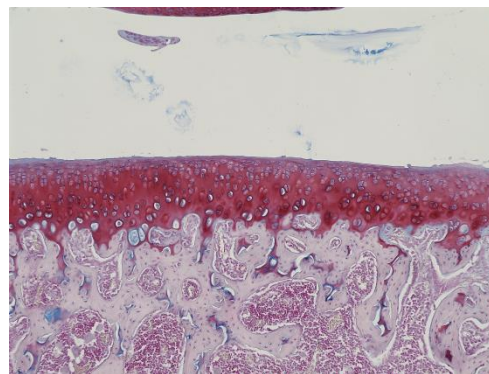

Indomethacin-treated  
rats with OA

**Supplemental Fig. 1.** Histochemical changes in joints of rats with osteoarthritis. Cartilage surface irregularities, diffuse hypercellularity, and decreased Safranin O staining were seen in joints of rats with OA 4 weeks after surgery. Daily administration of boiogito and indomethacin partially tended to alleviate the histochemical changes in articular cartilage of rats with OA.
